# Supplementary material for: Facile immobilization of enzyme on three dimensionally ordered macroporous silica via a biomimetic coating
Source: Royal Society of Chemistry journal article supplement (doi:10.1039/c4nj01947d), 2014-11-19
Supplement: c4nj01947d1.pdf [file c4nj01947d1.pdf]

## Electronic Supplementary Information

### Facile Immobilization of Enzyme on Three Dimensionally Ordered Macroporous Silica via a Biomimetic Coating

YanJun Jiang<sup>a</sup>, Yaping Wang<sup>a</sup>, Hua Wang<sup>a</sup>, Liya Zhou<sup>a</sup>, Jing Gao<sup>a\*</sup>, Yufei Zhang<sup>b</sup>, Xu Zhang<sup>a\*</sup>,

Xiaomei Wang<sup>a</sup>, Jian Li<sup>c</sup>

<sup>a</sup> *School of Chemical Engineering and Technology, Hebei University of Technology, Tianjin,*

*300130, China.*

<sup>b</sup> *National Key Laboratory of Biochemical Engineering, Institute of Process Engineering, Chinese*

*Academy of Sciences, Beijing 100190, China*

<sup>c</sup> *College of Material Science and Chemical Engineering, Tianjin University of*

*Science and Technology, Tianjin 300457, China*

\* Corresponding Author: Fax: +86-22-60204294; Tel: +86-22-60204293;

E-mail: [jgao@hebut.edu.cn](mailto:jgao@hebut.edu.cn); [xuzhang@hebut.edu.cn](mailto:xuzhang@hebut.edu.cn)

### **Determination of immobilized conditions**

5 mg of 3DOM SiO<sub>2</sub> was added to 1 mL of NE solution with different concentrations (0.5-2 mg/mL). The mixture was placed under dynamic vacuum and then incubated in a shaking water bath (25 °C, 150 r/min) for different time (1-5 h). Then the sample was centrifuged and washed three times with fresh phosphate buffer (0.1 M, pH 7.8). The obtained product was named PN-SiO<sub>2</sub>. The obtained PN-SiO<sub>2</sub> was added into 1 mL of PGA solution (0.5-12.5 mg/mL). Then the mixture was incubated at 25 °C for different time (0.5-5 h) with a shaking speed of 130 r/min. After centrifugation, the solid and the supernatant were collected, respectively. The solid was washed three times with the phosphate buffer (0.1M, pH 7.8). The solid was the immobilized PGA and named PGA@PN-SiO<sub>2</sub>. The supernatant was used to measure the concentration of the residual PGA to determine the enzyme loading. The results were shown in Fig. S1-3. The optimal immobilized conditions and activity of PGA@PN-SiO<sub>2</sub> were shown in Table S1.

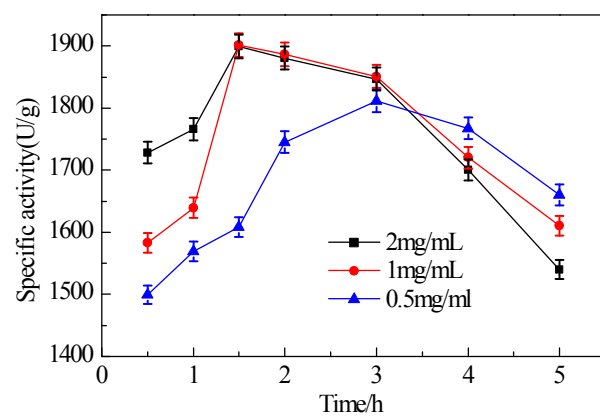

Fig. S1 Effect of NE concentration and modified time on activity of PGA@PN-SiO<sub>2</sub>. PGA concentration was 1.25mg/ml and immobilized time was 4 h.

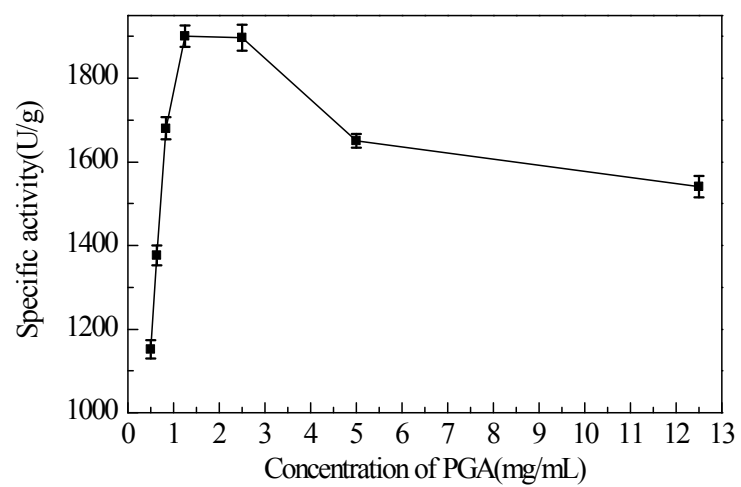

Fig. S2 Effect of PGA concentration on activity of PGA@PN-SiO<sub>2</sub>. NE concentration was 1mg/ml and immobilized time was 4 h.

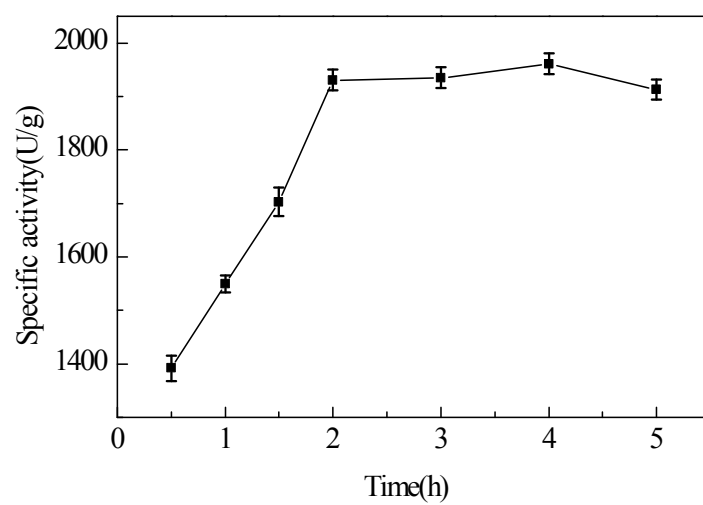

Fig. S3 Effect of immobilizing time on activity of PGA@PN-SiO<sub>2</sub>. PGA concentration was 1.25mg/ml and NE concentration was 1mg/ml.

Table S1 The optimal preparation conditions and immobilized yield of PGA@PN-SiO<sub>2</sub>

| NE<br>concentration<br>(mg/mL) | Modified<br>time (h) | PGA<br>concentration<br>(mg/mL) | Immobilized<br>time (h) | activity(U/mg<br>PGA) | Immobilized<br>yield | Enzyme<br>loading<br>amount(mg/g) |
|--------------------------------|----------------------|---------------------------------|-------------------------|-----------------------|----------------------|-----------------------------------|
| 1                              | 1.5                  | 1.25                            | 2                       | 20.31 ± 1.6           | 58% ± 3%             | 95 ± 4.5                          |

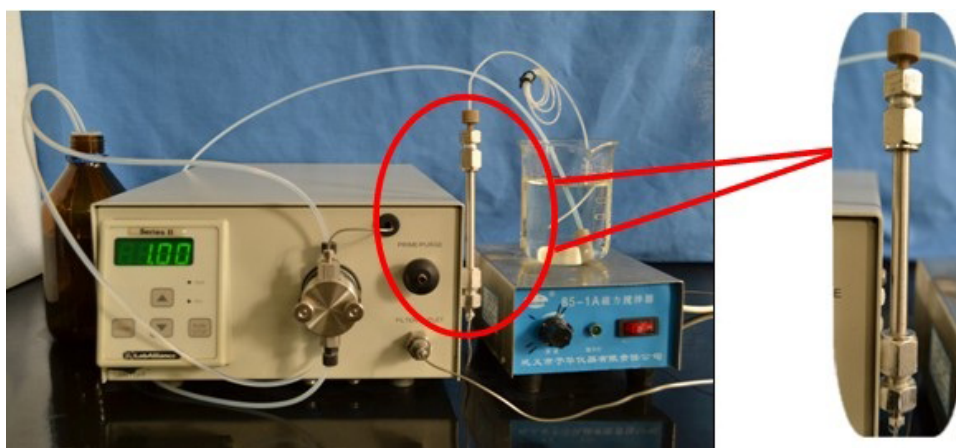

Fig. S4 The experimental setup of the packed bed reactor.

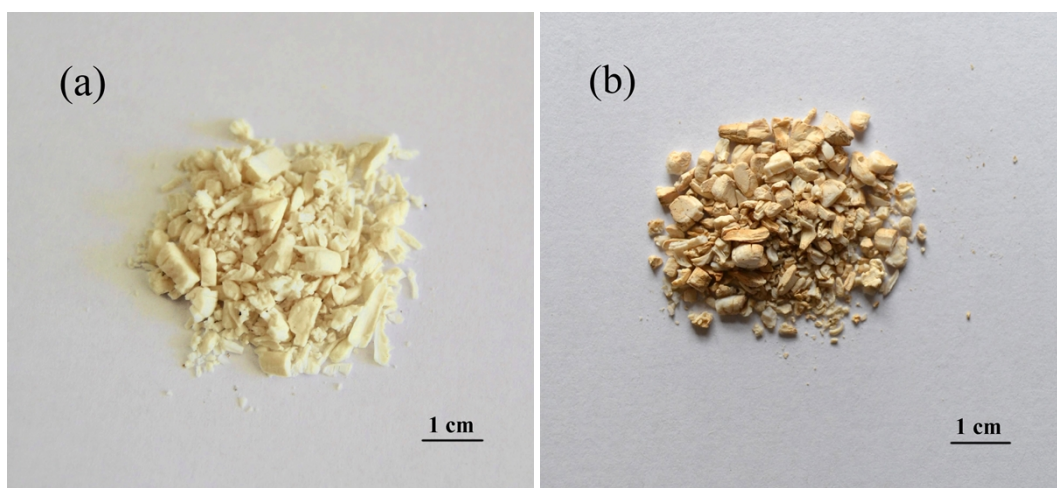

Fig. S5 Photographs of 3DOM silica (a) and PN-SiO<sub>2</sub> (b).
